# Supplementary material for: Evaluation of Soil Organic Layers Thickness and Soil Organic Carbon Stock in Hemiboreal Forests in Latvia
Source: MDPI journal article supplement (doi:10.3390/f12070840), 2021-06-25
Supplement: s1 [file s1]

**Table S1.** Average organic carbon concentrations in soil in forest land with organic soil in Latvia.

| Soil type and moisture conditions | Forest site types*           | Organic carbon concentration (average $\pm$ S.E.) in O horizon and different soil layer, g kg <sup>-1</sup> |                     |                     |                     |                     |                     |                     |
|-----------------------------------|------------------------------|-------------------------------------------------------------------------------------------------------------|---------------------|---------------------|---------------------|---------------------|---------------------|---------------------|
|                                   |                              | O horizon                                                                                                   | 0-10 cm             | 10-20 cm            | 20-30 cm            | 30-40 cm            | 40-50 cm            | 50-100 cm           |
| Wet organic soil                  | <i>Sphagnosa</i>             | 531.1<br>$\pm 10.4$                                                                                         | 516.8<br>$\pm 5.9$  | 515.9<br>$\pm 5.4$  | 517.3<br>$\pm 7.1$  | 517.2<br>$\pm 7.1$  | 519.7<br>$\pm 5.3$  | 521.7<br>$\pm 5.4$  |
|                                   | <i>Caricoso–phragmitosa</i>  | 516.7<br>$\pm 9.2$                                                                                          | 490.9<br>$\pm 18.1$ | 501.9<br>$\pm 19.6$ | 510.3<br>$\pm 23.0$ | 510.3<br>$\pm 23.0$ | 506.3<br>$\pm 26.3$ | 507.5<br>$\pm 26.3$ |
|                                   | <i>Dryopterioso–caricosa</i> | 490.6<br>$\pm 7.8$                                                                                          | 427.3<br>$\pm 22.2$ | 415.3<br>$\pm 30.4$ | 410.2<br>$\pm 37.2$ | 371.5<br>$\pm 45.1$ | 352.1<br>$\pm 46.7$ | 319.1<br>$\pm 49.3$ |
|                                   | <i>Filipendulosa</i>         | 494.5<br>$\pm 13.1$                                                                                         | 470.6<br>$\pm 9.5$  | 452.2<br>$\pm 21.0$ | 438.9<br>$\pm 42.8$ | 446.8<br>$\pm 47.3$ | 444.6<br>$\pm 42.0$ | 405.2<br>$\pm 56.2$ |
|                                   | weighted average**           | 509.5<br>$\pm 5.6$                                                                                          | 471.3<br>$\pm 11.3$ | 469.4<br>$\pm 14.2$ | 470.1<br>$\pm 17.1$ | 454.3<br>$\pm 20.1$ | 445.7<br>$\pm 21.5$ | 432.6<br>$\pm 23.2$ |
| Drained organic soil              | <i>Callunosa turf. mel.</i>  | 536.5                                                                                                       | 516.4<br>$\pm 8.3$  | 535.6<br>$\pm 7.9$  | 538.6<br>$\pm 9.6$  | 538.6<br>$\pm 9.6$  | 546.7<br>$\pm 11.2$ | 546.9<br>$\pm 10.9$ |
|                                   | <i>Vacciniosa turf. mel.</i> | 554.9<br>$\pm 3.5$                                                                                          | 518.6<br>$\pm 21.3$ | 539.7<br>$\pm 23.6$ | 543.2<br>$\pm 22.5$ | 543.6<br>$\pm 22.8$ | 539.8<br>$\pm 25.0$ | 562.6<br>$\pm 10.3$ |
|                                   | <i>Myrtillosa turf.mel.</i>  | 523.1<br>$\pm 4.9$                                                                                          | 510.6<br>$\pm 8.6$  | 508.5<br>$\pm 19.1$ | 500.0<br>$\pm 25.8$ | 500.9<br>$\pm 25.9$ | 468.6<br>$\pm 32.7$ | 468.0<br>$\pm 33.6$ |
|                                   | <i>Oxalidosa turf. mel.</i>  | 501.0<br>$\pm 4.8$                                                                                          | 436.8<br>$\pm 18.1$ | 415.2<br>$\pm 25.7$ | 377.2<br>$\pm 34.9$ | 334.1<br>$\pm 39.9$ | 287.3<br>$\pm 41.3$ | 242.2<br>$\pm 39.1$ |
|                                   | weighted average**           | 523.6<br>$\pm 4.1$                                                                                          | 494.0<br>$\pm 8.8$  | 492.0<br>$\pm 13.2$ | 478.7<br>$\pm 17.4$ | 468.6<br>$\pm 19.6$ | 439.4<br>$\pm 22.0$ | 431.8<br>$\pm 22.9$ |

\* According national classification system [20].

\*\* Weighted average takes into account the distribution of forest site types in Latvia according to the NFI data.

**Table S2.** Average soil bulk density in forest land with organic soil in Latvia.

| Soil type and moisture conditions | Forest site types*           | Soil bulk density (average $\pm$ S.E.),<br>g 100 cm <sup>-2</sup> (O horizon) or kg m <sup>-3</sup> (0-100 cm soil layer) |                     |                     |                     |                      |                      |                      |
|-----------------------------------|------------------------------|---------------------------------------------------------------------------------------------------------------------------|---------------------|---------------------|---------------------|----------------------|----------------------|----------------------|
|                                   |                              | O horizon                                                                                                                 | 0-10 cm             | 10-20 cm            | 20-30 cm            | 30-40 cm             | 40-50 cm             | 50-100 cm            |
| Wet organic soil                  | <i>Sphagnosa</i>             | 45.0<br>$\pm$ 2.2                                                                                                         | 77.1<br>$\pm$ 7.3   | 78.5<br>$\pm$ 5.1   | 69.5<br>$\pm$ 4.3   | 69.5<br>$\pm$ 4.3    | 62.7<br>$\pm$ 3.9    | 60.6<br>$\pm$ 4.0    |
|                                   | <i>Caricoso–phragmitosa</i>  | 44.6<br>$\pm$ 14.0                                                                                                        | 119.9<br>$\pm$ 15.5 | 133.0<br>$\pm$ 18.0 | 144.9<br>$\pm$ 25.8 | 144.9<br>$\pm$ 25.8  | 173.9<br>$\pm$ 44.1  | 173.2<br>$\pm$ 44.1  |
|                                   | <i>Dryopterioso–caricosa</i> | 19.4<br>$\pm$ 2.8                                                                                                         | 228.4<br>$\pm$ 22.4 | 266.3<br>$\pm$ 38.2 | 345.4<br>$\pm$ 78.6 | 434.0<br>$\pm$ 99.5  | 489.1<br>$\pm$ 109.4 | 610.9<br>$\pm$ 120.0 |
|                                   | <i>Filipendulosa</i>         | 12.7<br>$\pm$ 5.3                                                                                                         | 186.1<br>$\pm$ 6.6  | 252.1<br>$\pm$ 26.7 | 310.9<br>$\pm$ 98.1 | 282.1<br>$\pm$ 109.8 | 305.9<br>$\pm$ 126.5 | 295.0<br>$\pm$ 101.7 |
|                                   | weighted average**           | 34.0<br>$\pm$ 4.3                                                                                                         | 154.0<br>$\pm$ 12.3 | 174.9<br>$\pm$ 17.8 | 209.5<br>$\pm$ 33.0 | 245.5<br>$\pm$ 41.3  | 275.8<br>$\pm$ 47.5  | 324.8<br>$\pm$ 53.4  |
| Drained organic soil              | <i>Callunosa turf. mel.</i>  | 31.0                                                                                                                      | 108.3<br>$\pm$ 7.5  | 106.9<br>$\pm$ 11.5 | 86.2<br>$\pm$ 7.1   | 86.2<br>$\pm$ 7.1    | 77.7<br>$\pm$ 5.0    | 77.4<br>$\pm$ 5.3    |
|                                   | <i>Vacciniosa turf. mel.</i> | 26.9<br>$\pm$ 4.2                                                                                                         | 173.9<br>$\pm$ 23.8 | 179.1<br>$\pm$ 25.1 | 151.4<br>$\pm$ 18.4 | 142.8<br>$\pm$ 15.3  | 144.3<br>$\pm$ 28.2  | 112.9<br>$\pm$ 8.8   |
|                                   | <i>Myrtillosa turf. mel.</i> | 38.5<br>$\pm$ 5.5                                                                                                         | 169.4<br>$\pm$ 7.0  | 186.2<br>$\pm$ 15.3 | 232.0<br>$\pm$ 42.1 | 232.3<br>$\pm$ 42.1  | 298.2<br>$\pm$ 62.6  | 309.9<br>$\pm$ 67.8  |
|                                   | <i>Oxalidosa turf. mel.</i>  | 28.0<br>$\pm$ 2.7                                                                                                         | 241.1<br>$\pm$ 17.3 | 302.5<br>$\pm$ 31.5 | 489.7<br>$\pm$ 75.7 | 635.8<br>$\pm$ 97.2  | 741.0<br>$\pm$ 96.2  | 837.0<br>$\pm$ 100.9 |
|                                   | weighted average**           | 33.6<br>$\pm$ 2.2                                                                                                         | 185.2<br>$\pm$ 8.9  | 210.3<br>$\pm$ 14.9 | 275.6<br>$\pm$ 34.9 | 310.4<br>$\pm$ 44.4  | 371.8<br>$\pm$ 48.8  | 396.5<br>$\pm$ 55.7  |

\* According national classification system [20].

\*\* Weighted average takes into account the distribution of forest site types in Latvia according to the NFI data.
